# Supplementary material for: Myosin-dependent short actin filaments contribute to peripheral widening in developing stereocilia
Source: PubMed Central journal article supplement (PMC11643313; doi:10.21203/rs.3.rs-5448262/v1), 2024-12-05
Supplement: NIHPPRS5448262V1-supplement-1.pdf [file NIHPPRS5448262V1-supplement-1.pdf]

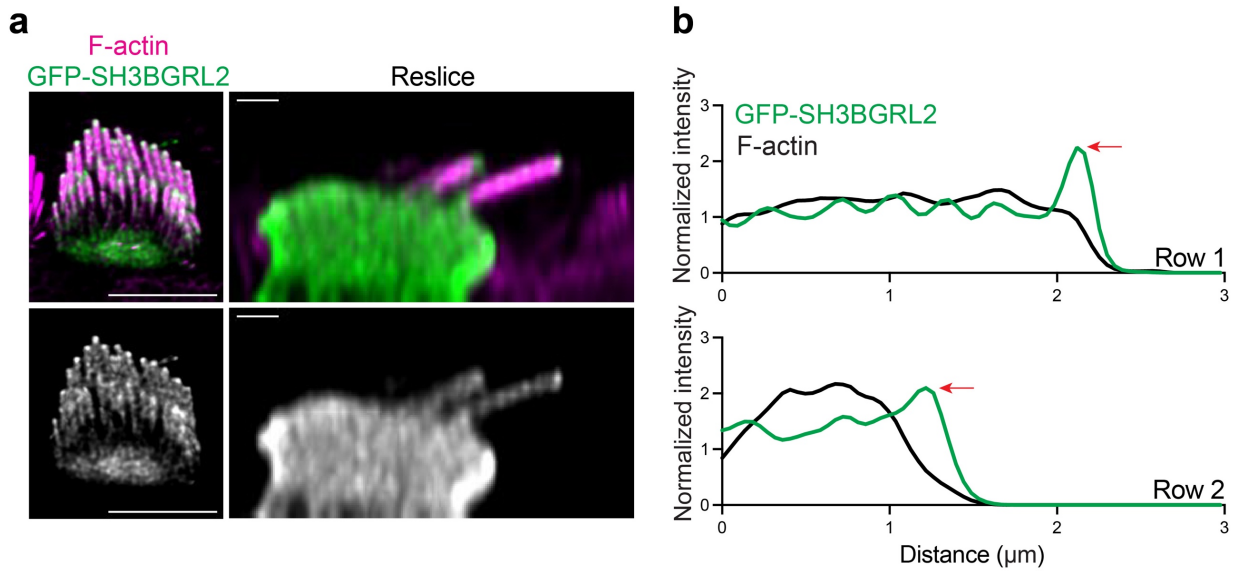

463 **Supplementary Fig. 1: Localization of transfected EGFP-SH3BGRL2 in IHCs.**

464 **a**, Representative images of EGFP-SH3BGRL2 distribution in transfected P5 IHCs. Left panels are 2D  
 465 projections of x-y slices (scale bar represents 5  $\mu\text{m}$ ). Right panels are projections of x-z reslices to show the  
 466 side view of stereocilia (scale bar represents 1  $\mu\text{m}$ ). **b**, The fluorescence distribution of EGFP-SH3BGRL2  
 467 and phalloidin stained F-actin measured on the line scan of a stereocilium in (a). Red arrows indicate that  
 468 the intensity of EGFP-SH3BGRL2 reaches near its peak at stereocilia tips.

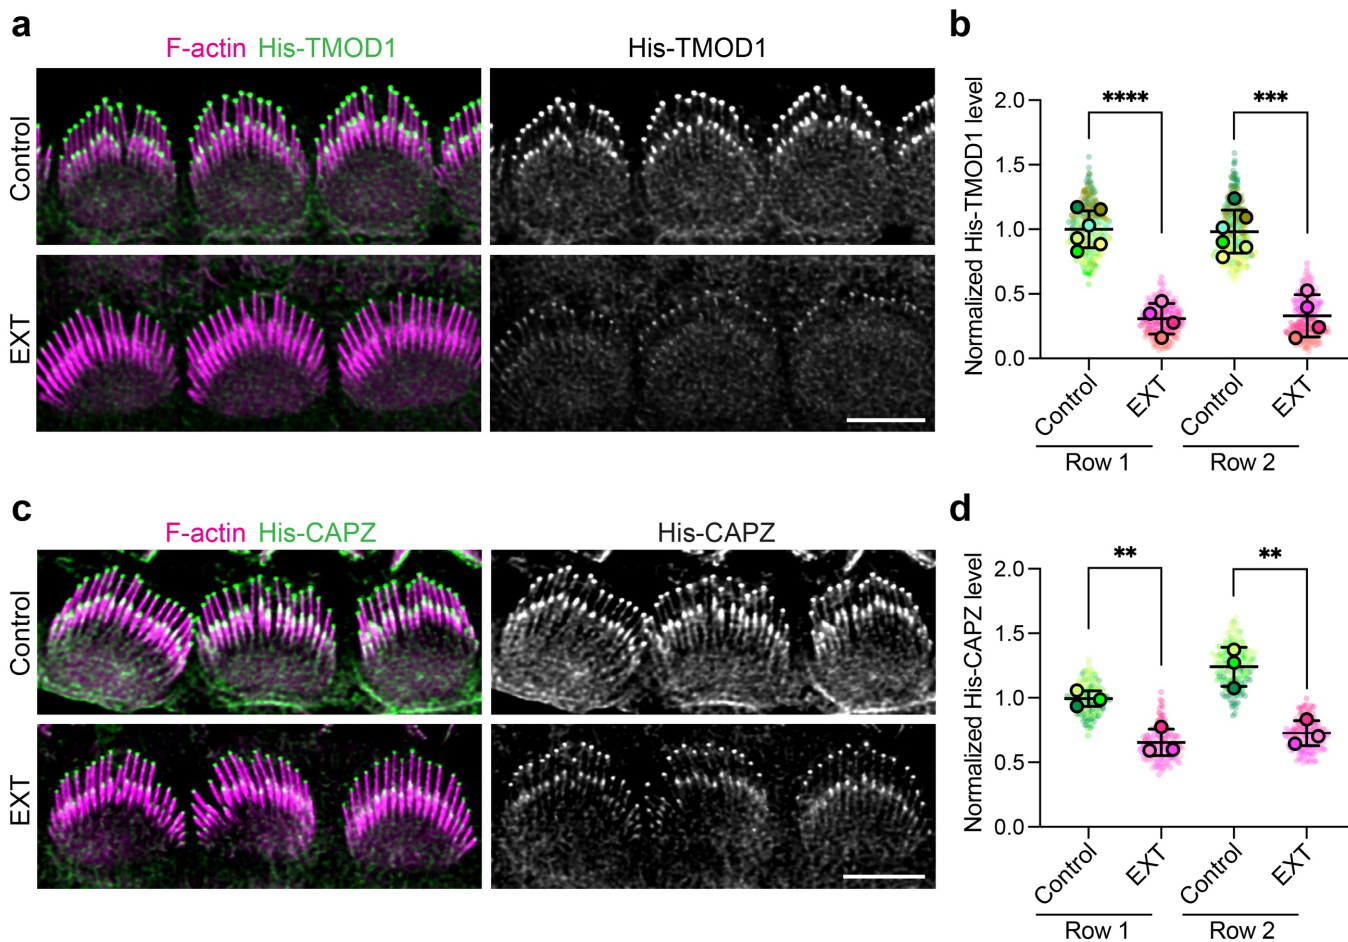

469 **Supplementary Fig. 2: Tip filaments are separate from the stereocilia core filaments.**

470 **a**, His-TMOD1 staining (green, grey) in P5 IHCs after high salt extraction (EXT); F-actin was stained with  
 471 phalloidin (magenta). **b**, Quantification of His-TMOD1 level from row 1 and row 2 stereocilia tips. The  
 472 fluorescence intensity was normalized to the average fluorescence intensity of row 1 control treatment. **c**,  
 473 His-CAPZ staining (green, grey) in P5 IHCs after high salt extraction; F-actin was stained with phalloidin  
 474 (magenta). **d**, Quantification of His-CAPZ level from row 1 and row 2 stereocilia tips. Smaller circles  
 475 represent stereocilia; larger open circles represent cochleae (N). *P* values for two-tailed unpaired *t* tests  
 476 comparing N are indicated (\*\*, *P* < 0.01; \*\*\*, *P* < 0.001; \*\*\*\*, *P* < 0.0001). Results from 3-6 mice were  
 477 averaged and plotted  $\pm$  SD. All scale bars represent 5  $\mu$ m.

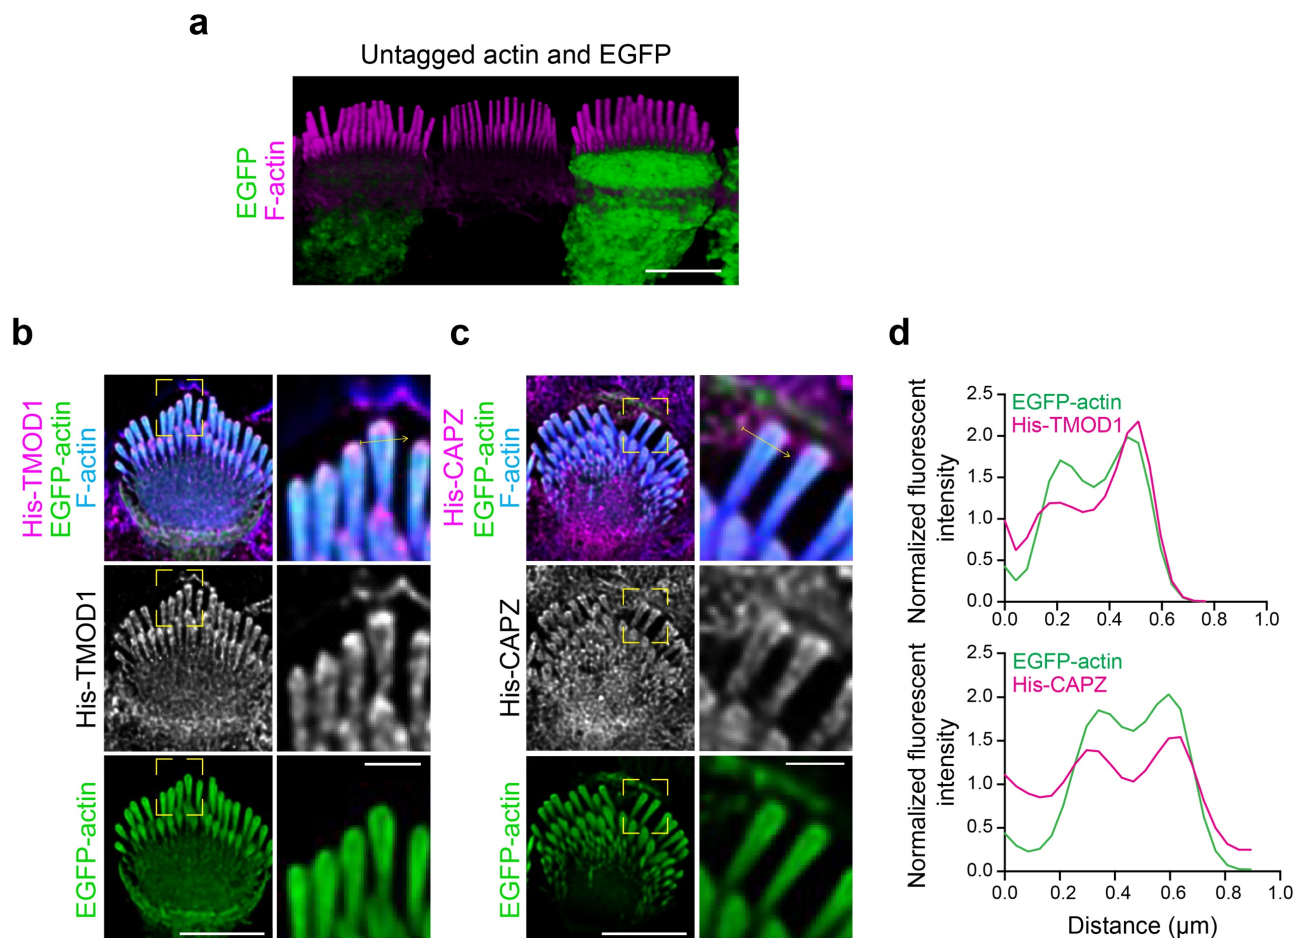

478 **Supplementary Fig. 3: Untagged actin overexpression promotes stereocilia widening.**

479 **a**, Representative image showing a 3D reconstruction of P5 IHCs transfected by Actin-IRES-EGFP.  
 480 Transfected IHCs, identified by cytoplasmic EGFP, exhibit wider stereocilia compared to a neighboring  
 481 untransfected IHC. F-actin is stained by phalloidin (magenta). **b-c**, Representative images showing His-  
 482 TMOD1 (**b**) or His-CAPZ staining (**c**) (magenta, grey) in widened stereocilia (blue) from IHCs transfected with  
 483 EGFP-actin (green) (scale bar represents 5  $\mu\text{m}$ ). Regions marked by yellow boxes are magnified to the right  
 484 panels (scale bar represents 1  $\mu\text{m}$ ). The yellow arrows indicate line scans graphed in (**d**). **d**, The  
 485 fluorescence distribution of His-TMOD1 or His-CAPZ (magenta) with EGFP-actin (green). The fluorescence  
 486 intensity was normalized to the average fluorescence intensity of each label.

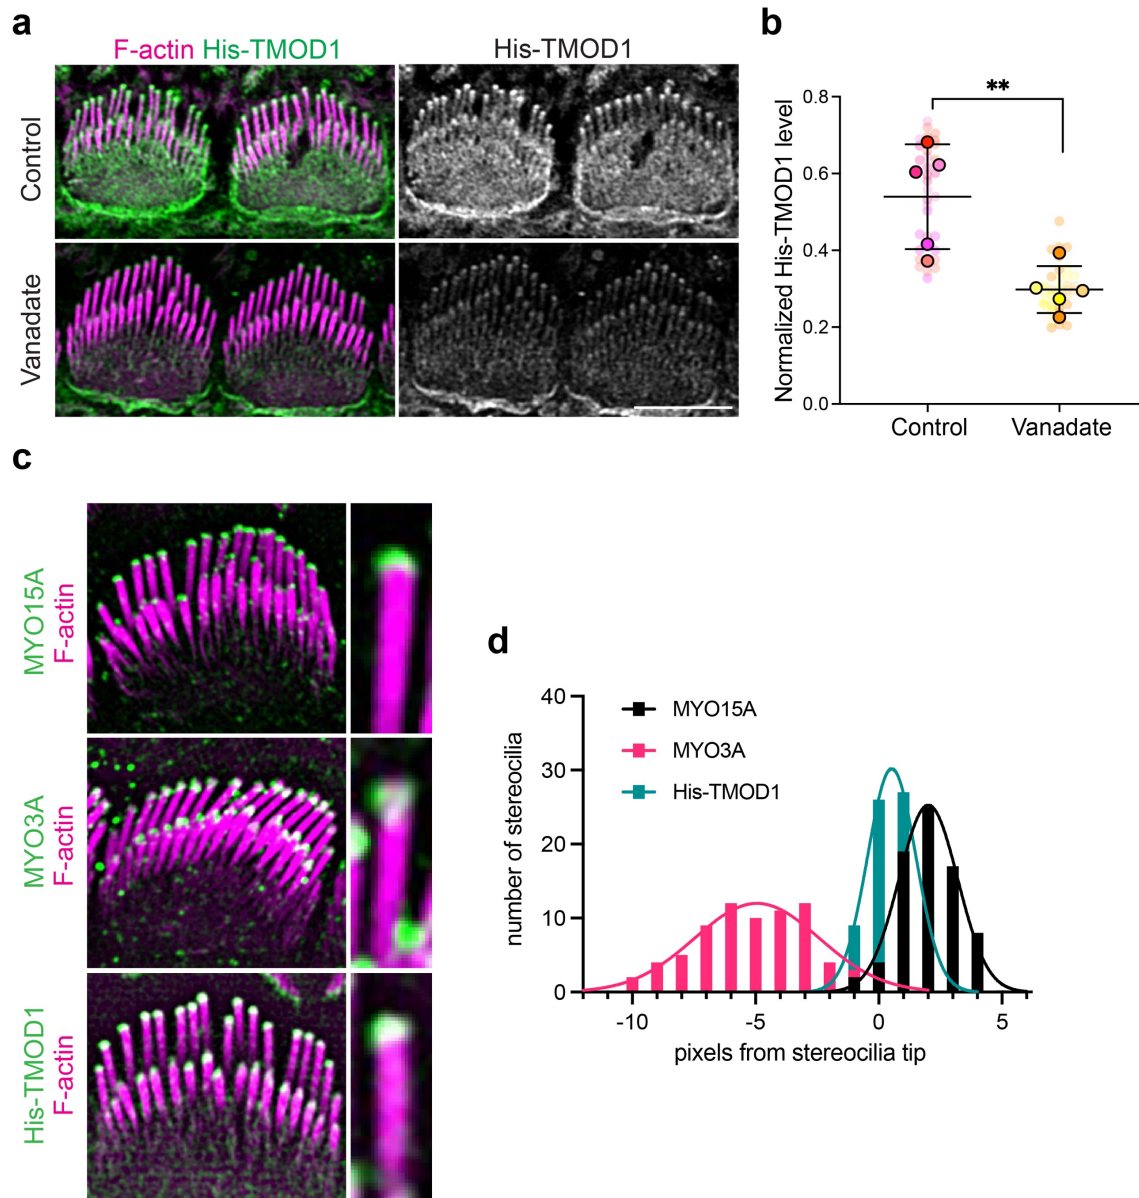

487 **Supplementary Fig. 4: Tip filaments are likely stabilized or produced by myosins.**

488 **a**, His-TMOD1 staining (green, grey) in P5 IHCs incubated with or without vanadate. **b**, Quantification of His-  
 489 TMOD1 level at stereocilia tips in vanadate-treated and untreated IHCs. Smaller circles represent stereocilia;  
 490 larger open circles represent cochleae (N). *P* values for two-tailed unpaired *t* tests are indicated based on N  
 491 (\*\*, *P* < 0.01). Results from 5 cochleae were averaged and plotted  $\pm$  SD. **c**, Representative lattice SIM  
 492 images showing the localization of endogenous MYO15A, MYO3A, and His-TMOD1 (green) in IHC bundles.  
 493 The magnified insets show the localization of each protein at row 1 stereocilia tips compared to phalloidin-  
 494 stained F-actin (magenta). **d**, A frequency histogram showing the pixel offset of MYO15A (black), MYO3A  
 495 (red) and His-TMOD1 (blue) from the actin core. The histogram of each probe is fitted in a Gaussian curve.  
 496 Mean offsets for peak of the Gaussian curves: MYO15A, 62 nm; MYO3A, -153 nm; His-TMOD1, 16 nm. R-  
 497 squared value of the fit: MYO15A, 0.985; MYO3A, 0.921; His-TMOD1, 0.996. The stereocilia tip was defined  
 498 as being the point where phalloidin intensity reached the average value in the tip region.



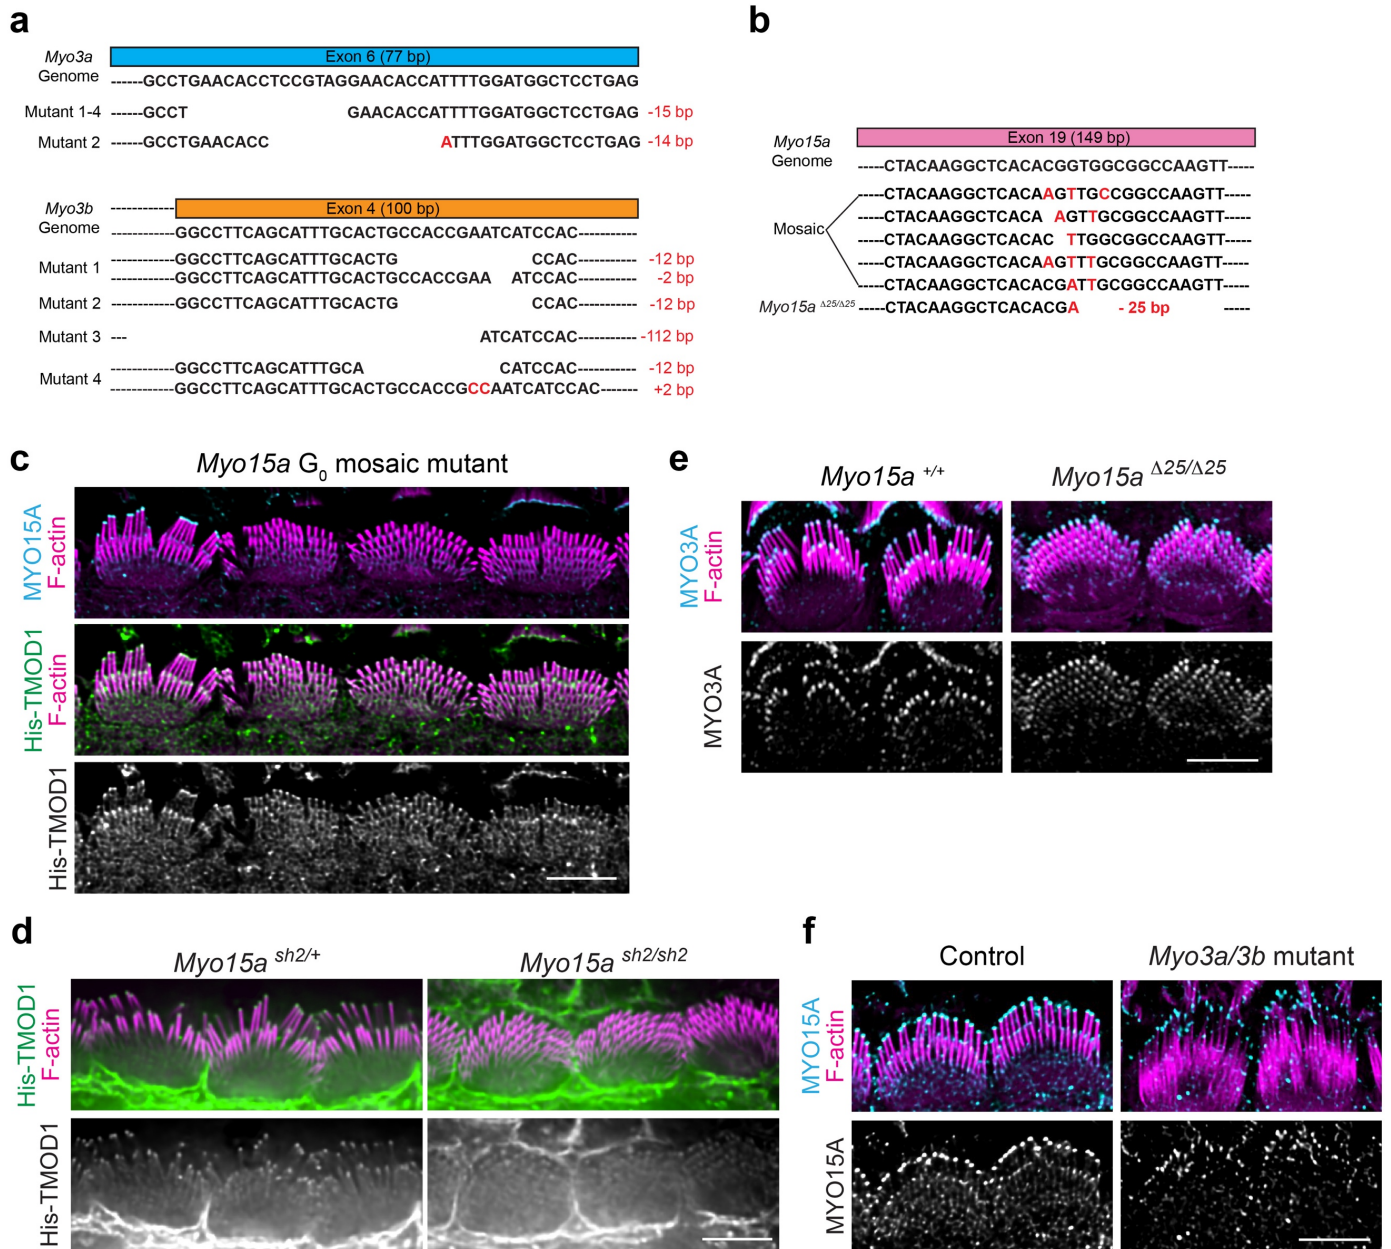

499 **Supplementary Fig. 5: Characterization of mutant *Myo3* and *Myo15a* alleles.**

500 **a-b**, Schematics showing mutant alleles detected by nanopore sequencing of genomic DNA from pups that  
 501 were mutated by CRISPR/Cas9 gRNAs targeting *Myo3a* and *Myo3b* concurrently (a) or *Myo15a* (b) that  
 502 were delivered to mouse embryos by the iGONAD method. **c**, Mutant *Myo15a* exhibiting a mosaic phenotype.  
 503 MYO15A (cyan) and His-TMOD (green, grey) at highest at the tips of the hair cell at left that retains normal  
 504 stereocilia lengths, but His-TMOD1 is reduced at the tips of stereocilia on neighboring hair cells that are short  
 505 and lack MYO15A. **d**, His-TMOD1 staining (green, grey) in P4 IHCs from mice heterozygous or homozygous  
 506 for the *sh2* loss-of-function mutation. Homozygous mutants have short stereocilia with reduced His-TMOD1  
 507 staining. **e**, MYO3A immunostaining (cyan, grey) of either wildtype or *Myo15a*<sup>Δ25/Δ25</sup> P4 IHC stereocilia. **f**,  
 508 MYO15A immunostaining (cyan, grey) of either wildtype or *Myo3a/Myo3b* mutant P4 IHC stereocilia. F-actin  
 509 was stained with phalloidin (magenta) in (c-f).

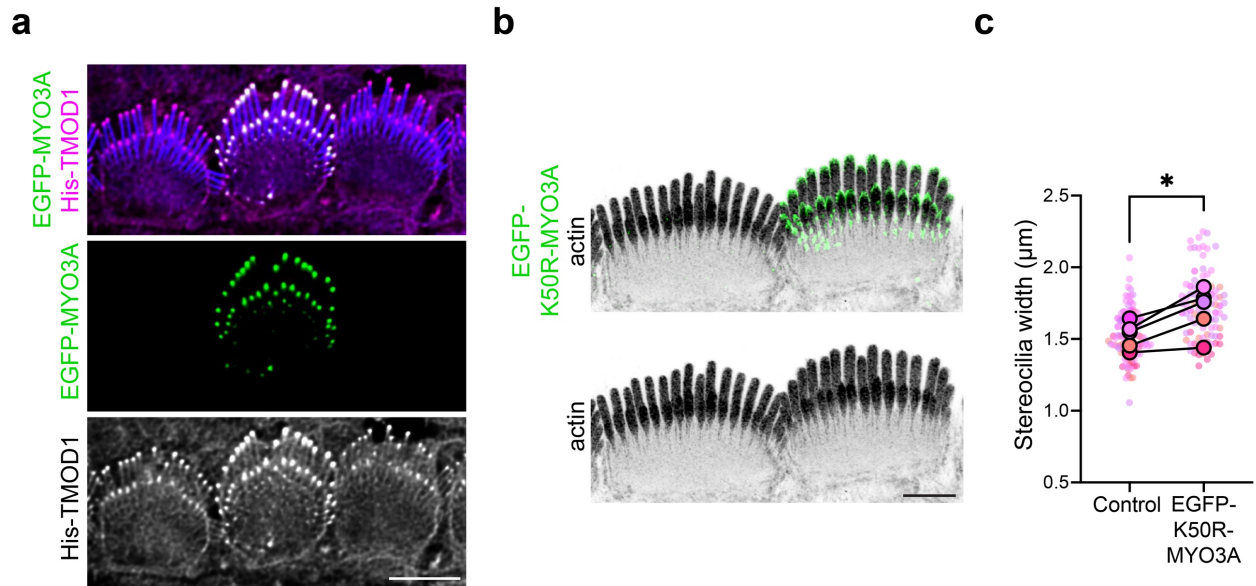

510 **Supplementary Fig. 6: Overexpression of EGFP-MYO3A and stereocilia widening.**

511 **a**, Representative images comparing His-TMOD1 staining (magenta, grey) in P5 IHCs transfected with  
 512 wildtype (WT) EGFP-MYO3A (green) compared to neighboring untransfected cells. F-actin is stained with  
 513 phalloidin (blue). **b**, Representative expansion microscopy images of an EGFP-K50R-MYO3A transfected  
 514 IHC adjacent to an untransfected IHC at P5. EGFP-K50R-MYO3A (green) was stained with an antibody to  
 515 EGFP, and actin (grey) was stained with anti- $\gamma$ -actin antibody. **c**, Quantification of stereocilia width in EGFP-  
 516 MYO3A-K50R transfected cells and untransfected cells. Smaller represent individual stereocilia and larger  
 517 open circles represent cochleae. Results were collected from 5 cochleae.  $P$  values for two-tailed paired  $t$   
 518 tests are indicated (\*,  $P < 0.05$ ), comparing averages of cochleae. Scale bars in all panels represents 5  $\mu\text{m}$ .
